# Supplementary material for: Green bionanocomposites from high-elasticity “soft” polyurethane and high-crystallinity “rigid” chitin nanocrystals with controlled surface acetylation
Source: Royal Society of Chemistry journal article supplement (doi:10.1039/c4ra07899c), 2014-01-01
Supplement: c4ra07899c1.pdf [file c4ra07899c1.pdf]

## Supplemental Information

Green bionanocomposites from high-elasticity “soft”  
polyurethane and high-crystallinity “rigid” chitin  
nanocrystals with controlled surface acetylation

Ning Lin,<sup>ab</sup> Siwen Wei,<sup>c</sup> Tao Xia,<sup>a</sup> Fei Hu,<sup>a</sup> Jin Huang,<sup>a\*</sup> and Alain Dufrense<sup>b</sup>

<sup>a</sup> Department of Chemical Engineering, College of Chemistry, Chemical Engineering and Life Sciences, Wuhan University of Technology, Wuhan 430070, China

<sup>b</sup> Grenoble Institute of Technology (Grenoble INP) – The International School of Paper, Print Media and Biomaterials (Pagora), CS10065, 38402 Saint Martin d'Hères Cedex, France

<sup>c</sup> College of Materials Science and Engineering, Wuhan University of Technology, Wuhan 430070, China

## Amount of Surface Hydroxyl Groups ( $n_{\text{surface-OH}}$ ) on Chitin Nanocrystals

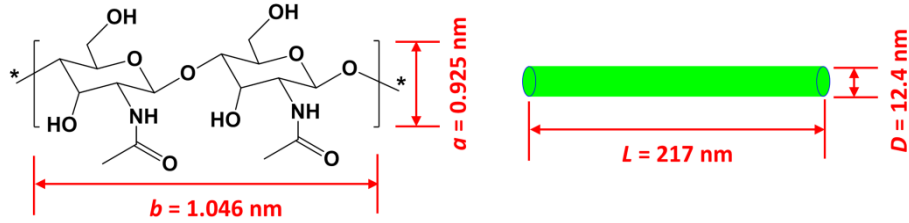

$$n_{\text{surface-OH}} = \frac{N_1 N_2}{N_A} \quad (S-1)$$

$$N_1 = \left( \frac{w}{\rho_{\text{chitin}}} \right) / V_{\text{ChN}} = \left( \frac{w}{\rho_{\text{chitin}}} \right) / \left( \frac{\pi}{4} D^2 L \right) \quad (S-2)$$

$$N_2 = 4 \left( \frac{S_{\text{ChN}}}{S'} \right) = 4 \frac{\pi D L}{ab} \quad (S-3)$$

in here,  $N_A = 6.02 \times 10^{23} \text{ mol}^{-1}$  (Avogadro's number),  $\rho_{\text{chitin}} = 1.425 \text{ g/cm}^3$ ,  $w = 1 \text{ g}$

The data of size of the unit cell of chitin ( $a$ ,  $b$ ) and density of chitin crystallites ( $\rho_{\text{chitin}}$ ) were from following references:

- 1 G.L. Clark and A.F. Smith, *J. Phys. Chem.* 1936, **40**, 863.
- 2 J. Li, J.-F. Revol, E. Naranjo and R.H. Marchessault, *Int. J. Biol. Macromol.* 1996, **18**, 177.

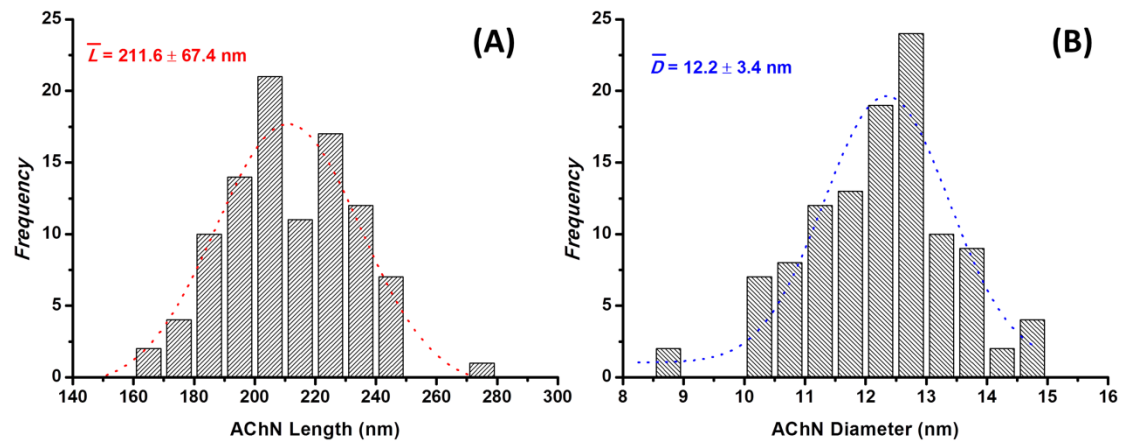

**Figure S1.** Size statistics for length ( $L$ , image A) and diameter ( $D$ , image B) of AChN from TEM images; dashed lines are Gaussian distribution fitting line according to the statistical data.

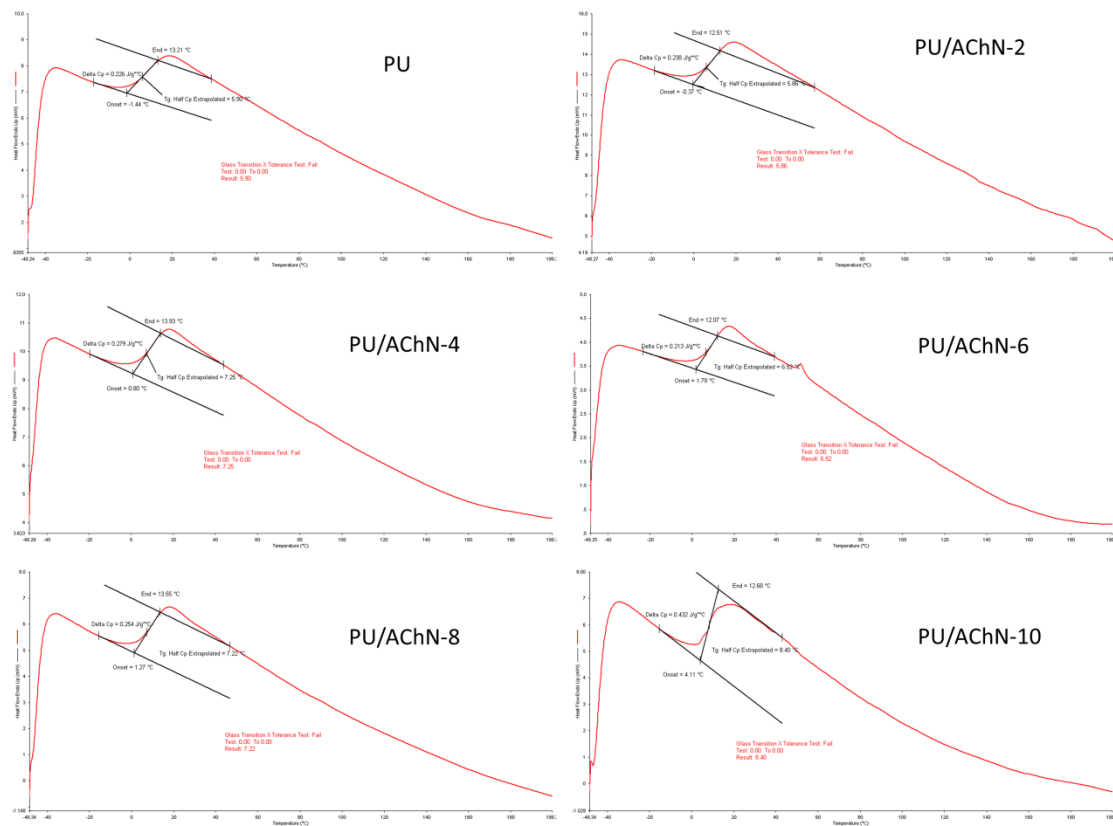

**Figure S2.** DSC thermograms of PU-based nanocomposites filled with various contents of AChN.

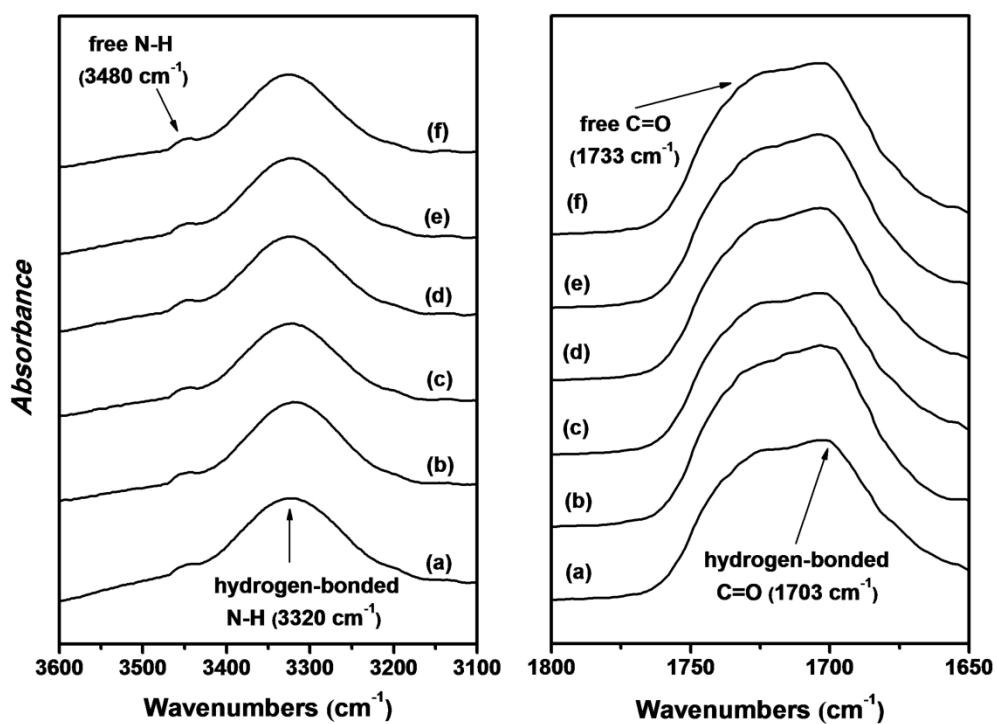

**Figure S3.** Amplified FTIR spectra of PU/AChN nanocomposites and neat PU material at the regions of 3600–3100  $\text{cm}^{-1}$  and 1800–1650  $\text{cm}^{-1}$ . (a) PU, (b) PU/AChN-2, (c) PU/AChN-4, (d) PU/AChN-6, (e) PU/AChN-8, (f) PU/AChN-10.
